# Supplementary material for: Future Incidence of Malignant Mesothelioma in South Korea: Updated Projection to 2038
Source: MDPI journal article supplement (doi:10.3390/ijerph18126614), 2021-06-19
Supplement: s1 [file s1]

**Supplementary Table S1. Amounts of asbestos imported, exported, and produced in South Korea by year (unit: metric ton)**

| Year  | Import | Export | Production | Year | Import | Export | Production | Year | Import    | Export | Production |
|-------|--------|--------|------------|------|--------|--------|------------|------|-----------|--------|------------|
| 1940  | 5,081  | –      | 508        | 1963 | –      | –      | 2,037      | 1986 | 68,017    | 0      | 2,983      |
| 1941  | –      | –      | –          | 1964 | –      | –      | 1,402      | 1987 | 77,598    | 41     | 2,518      |
| 1942  | –      | –      | –          | 1965 | –      | –      | 1,710      | 1988 | 87,470    | 0      | 2,428      |
| 1943  | –      | –      | –          | 1966 | –      | –      | 687        | 1989 | 77,475    | 0      | 2,351      |
| 1944  | –      | –      | 4,815      | 1967 | –      | –      | 2,388      | 1990 | 74,549    | 5      | 1,534      |
| 1945  | –      | –      | 1,303      | 1968 | –      | –      | –          | 1991 | 88,753    | 157    | 0          |
| 1946  | –      | –      | –          | 1969 | –      | –      | 6,515      | 1992 | 95,476    | 23     | 0          |
| 1947  | –      | –      | –          | 1970 | 35,292 | –      | 1,513      | 1993 | 82,854    | 18     | 0          |
| 1948  | –      | –      | –          | 1971 | –      | –      | –          | 1994 | 83,276    | 86     | 0          |
| 1949  | –      | –      | –          | 1972 | –      | –      | –          | 1995 | 88,722    | 16     | 0          |
| 1950  | –      | –      | 46         | 1973 | –      | –      | –          | 1996 | 77,145    | 15     | 0          |
| 1951  | –      | –      | 46         | 1974 | –      | –      | –          | 1997 | 44,985    | 0      | 0          |
| 1952  | –      | –      | 46         | 1975 | 56,960 | –      | 4,345      | 1998 | 29,619    | 1      | 0          |
| 1953  | –      | –      | 46         | 1976 | 74,206 | 16     | 4,762      | 1999 | 32,519    | 0      | 0          |
| 1954  | –      | –      | 46         | 1977 | 70,255 | 75     | 6,180      | 2000 | 28,972    | 11     | 0          |
| 1955  | –      | –      | 66         | 1978 | 48,898 | 10     | 13,616     | 2001 | 26,307    | 5      | 0          |
| 1956  | –      | –      | 54         | 1979 | 58,610 | 8      | 14,804     | 2002 | 21,503    | 9      | 0          |
| 1957  | –      | –      | 96         | 1980 | 36,787 | 30     | 9,854      | 2003 | 22,032    | 0      | 0          |
| 1958  | –      | –      | 22         | 1981 | 53,787 | 40     | 13,614     | 2004 | 14,580    | 0      | 0          |
| 1959  | –      | –      | 88         | 1982 | 44,038 | 12     | 15,933     | 2005 | 6,476     | 0      | 0          |
| 1960  | –      | –      | 740        | 1983 | 60,896 | 0      | 12,506     | 2006 | 4,701     | 0      | 0          |
| 1961  | –      | –      | 341        | 1984 | 59,693 | 0      | 8,062      | 2007 | 1,094     | 0      | 0          |
| 1962  | –      | –      | 1,333      | 1985 | 57,143 | 17     | 4,703      | 2008 | 383       | 0      | 0          |
| Total |        |        |            |      |        |        |            |      | 1,796,152 | 595    | 146,061    |
